# Supplementary material
Source: Springer Nature journal article supplement (https://www.springermedizin.de/resource/supplementary/12887_2014_1193_MOESM4_ESM.pdf/9476770)
Supplement: MOESM4 [file 9476770]

**Quantitative codes**

**Themes**

**Qualitative codes**

Viewing the body

To be able to say  
goodbye to their  
child

Saying goodbye

Autopsy

Why did my child  
die?

To know how and  
why their child died

Needing  
Information

Emergency  
services

Professional  
Support

Follow-up

Emotional  
Support

Emotional  
Support

To feel supported

Poor  
communication

Practical  
Information

Abandoned by  
services

Breaking Bad  
News
